# Supplementary material for: Physical Activity Is Associated With Macular Thickness: A Multi-Cohort Observational Study
Source: PubMed Central journal article supplement (PMC9988706; doi:10.1167/iovs.64.3.11), 2023-03-03
Supplement: iovs-64-3-11_s001.pdf [file iovs-64-3-11_s001.pdf]

## SUPPLEMENTARY RESOURCES

**Supplementary Table 1: Summary Statistics for PROGRESSA Cohort**

| <b>PROGRESSA Summary Statistics</b><br><b>(n = 735 eyes / 388 participants)</b> |                  |
|---------------------------------------------------------------------------------|------------------|
| <b>Demographic Characteristics</b>                                              |                  |
| Age (years)                                                                     | 70.4±8.8         |
| <b>Sex</b>                                                                      |                  |
| Female                                                                          | 420 / 220 [56.7] |
| Male                                                                            | 315 / 168 [43.3] |
| <b>Socio-economic Decile</b>                                                    | 6.4±2.8          |
| <b>Cardiovascular Characteristics</b>                                           |                  |
| Systolic Blood Pressure (mmHg)                                                  | 137.2±20.4       |
| <b>Diabetes</b>                                                                 |                  |
| Yes                                                                             | 107 / 55 [14.2]  |
| No                                                                              | 626 / 333 [85.8] |
| <b>Ocular Characteristics</b>                                                   |                  |
| <b>Topical Glaucoma Therapy</b>                                                 |                  |
| Yes                                                                             | 322 / 170 [43.8] |
| No                                                                              | 413 / 218 [52.2] |
| <b>Highest Intraocular Pressure (mmHg)</b>                                      | 20.6±5.5         |
| <b>Glaucoma Characterization</b>                                                |                  |
| Early Manifest Glaucoma                                                         | 264 / 142 [36.5] |
| Suspect                                                                         | 471 / 246 [63.5] |
| <b>Baseline average macular GCIPL thickness (um)</b>                            | 74.9±8.2         |

Supplementary Table 1 summarizes the baseline demographic, cardiovascular and ocular characteristics for PROGRESSA study participants. Summary statistics for continuous variables are reflected as mean±standard deviation, and summary statistics for discrete variables are reflected as number (n) of eyes followed by number of participants (n of eyes / n of participants) with proportion of participants for each characteristic displayed in parenthesis. Age and socio-economic decile are represented as per participant summary. Highest intraocular pressure and baseline macular GCIPL thickness are displayed as per eye summary.

**Supplementary Table 2: UK Biobank Summary Statistics**

| <b>UK Biobank Summary Statistics<br/>(n = 8862 eyes / 6152 participants)</b> |                    |
|------------------------------------------------------------------------------|--------------------|
| <b>Demographic Characteristics</b>                                           |                    |
| Age (years)                                                                  | 54.9±8.2           |
| Sex                                                                          |                    |
| Female                                                                       | 4985 / 3471 [56.4] |
| Male                                                                         | 3877 / 2681 [43.6] |
| <b>Systemic Characteristics</b>                                              |                    |
| <b>Hypertension</b>                                                          |                    |
| Yes                                                                          | 2062 / 1462 [23.7] |
| No                                                                           | 6800 / 4690 [76.7] |
| <b>Diabetes</b>                                                              |                    |
| Yes                                                                          | 263 / 180 [2.9]    |
| No                                                                           | 8599 / 5972 [97.1] |
| <b>Stroke</b>                                                                |                    |
| Yes                                                                          | 70 / 52 [0.8]      |
| No                                                                           | 8792 / 6100 [99.2] |
| <b>Alzheimers Disease (n [%])</b>                                            |                    |
| Yes                                                                          | 30 / 23 [0.4]      |
| No                                                                           | 8832 / 6129 [99.6] |
| <b>IOP (mmHg)</b>                                                            | 15.3±3.1           |

Supplementary Table 2 summarizes the baseline demographic, cardiovascular and ocular characteristics for UK Biobank study participants. Summary statistics for continuous variables are reflected as mean±standard deviation, and summary statistics for discrete variables are reflected as number (n) of eyes followed by number of participants (n eyes / n participants) with proportion of participants for each characteristic displayed in parenthesis. Age is represented as per participant summary. Intraocular pressure is displayed as per eye mean intraocular pressure.
